# Supplementary material
Source: PubMed Central journal article supplement (PMC6726900)
Supplement: EMBR-20-e47987-s001.pdf [file EMBR-20-e47987-s001.pdf]

## **Tesi et al. Appendix**

|                    |   |
|--------------------|---|
| Appendix Legends   | 2 |
| Appendix Figure S1 | 3 |
| Appendix Figure S2 | 4 |
| Appendix Figure S3 | 5 |
| Appendix Table S1  | 6 |

## Appendix Figure Legends

**Appendix Figure S1 Tat-Cre transiently induces LPS-responsive genes, but does not interfere with the subsequent LPS response, and does not act as a mitogenic stimulus.**

**A.** To control for LPS contamination in bacterially purified Tat-Cre we treated freshly purified primary *c-myc*<sup>wt/wt</sup> B-cells for 1 hour and monitored the expression of 2 LPS-responsive genes (*junb* and *Ikβa*) by RT-PCR. RNA was isolated at the indicated time-points after treatment with either Tat-Cre or LPS as positive control. While induced by Tat-CRE treatment at short time-points, the *junb* and *Ikβa* mRNAs returned to background levels (i.e. the same as in untreated cells) after 12h, at which time we started our LPS time-course experiments (i.e. time 0 in our LPS time-courses).

**B.** Pretreatment with Tat-CRE does not affect the response of *junb* and *Ikβa* to LPS. RNA was collected 12h after Tat-Cre treatment (0h LPS) and 1,2 and 4h after LPS stimulation.

**C.** Growth curves of wt B-cells treated with Tat-Cre alone, LPS alone, Tat-Cre followed by LPS or left untreated (none).

## Appendix Figure S2

Zoom-in heatmaps and boxplot representations for the clusters represented in Fig. 4D.

## Appendix Figure S3

Zoom-in heatmaps and boxplot representations for the clusters represented in Fig. 4E.

## Appendix Table S1

List of the primers used in this work.

**A**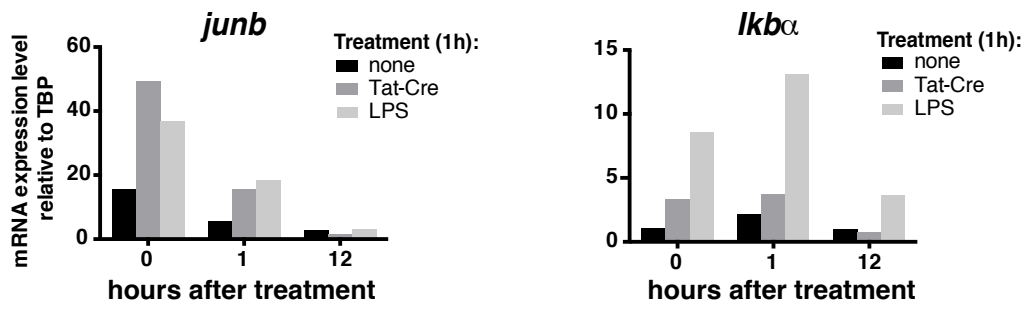**B**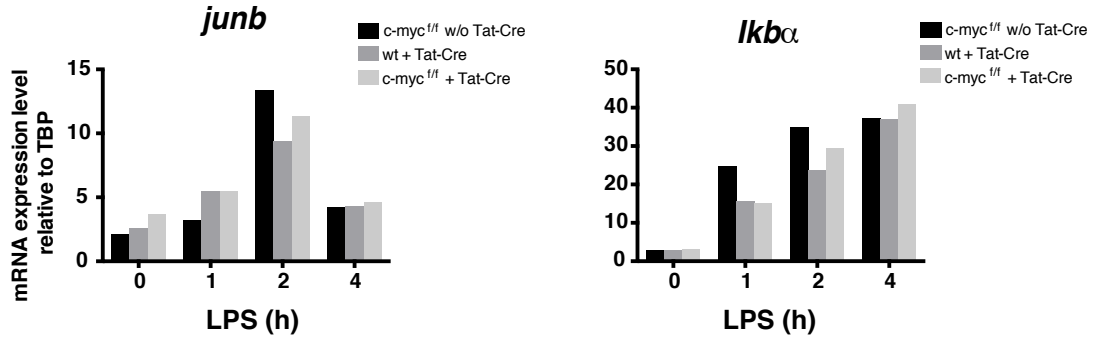**C**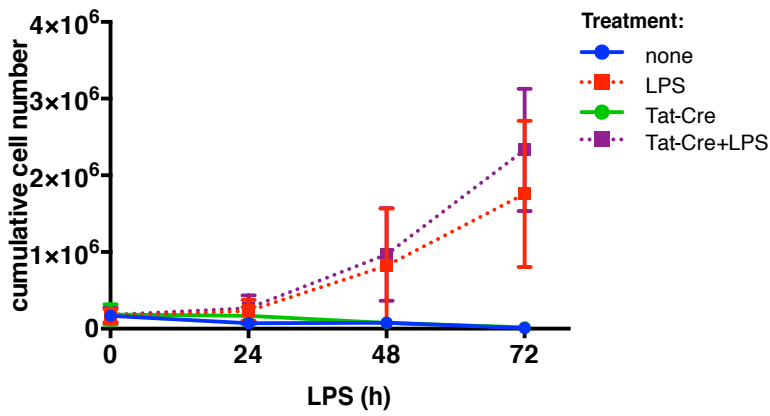

# Myc-dependent

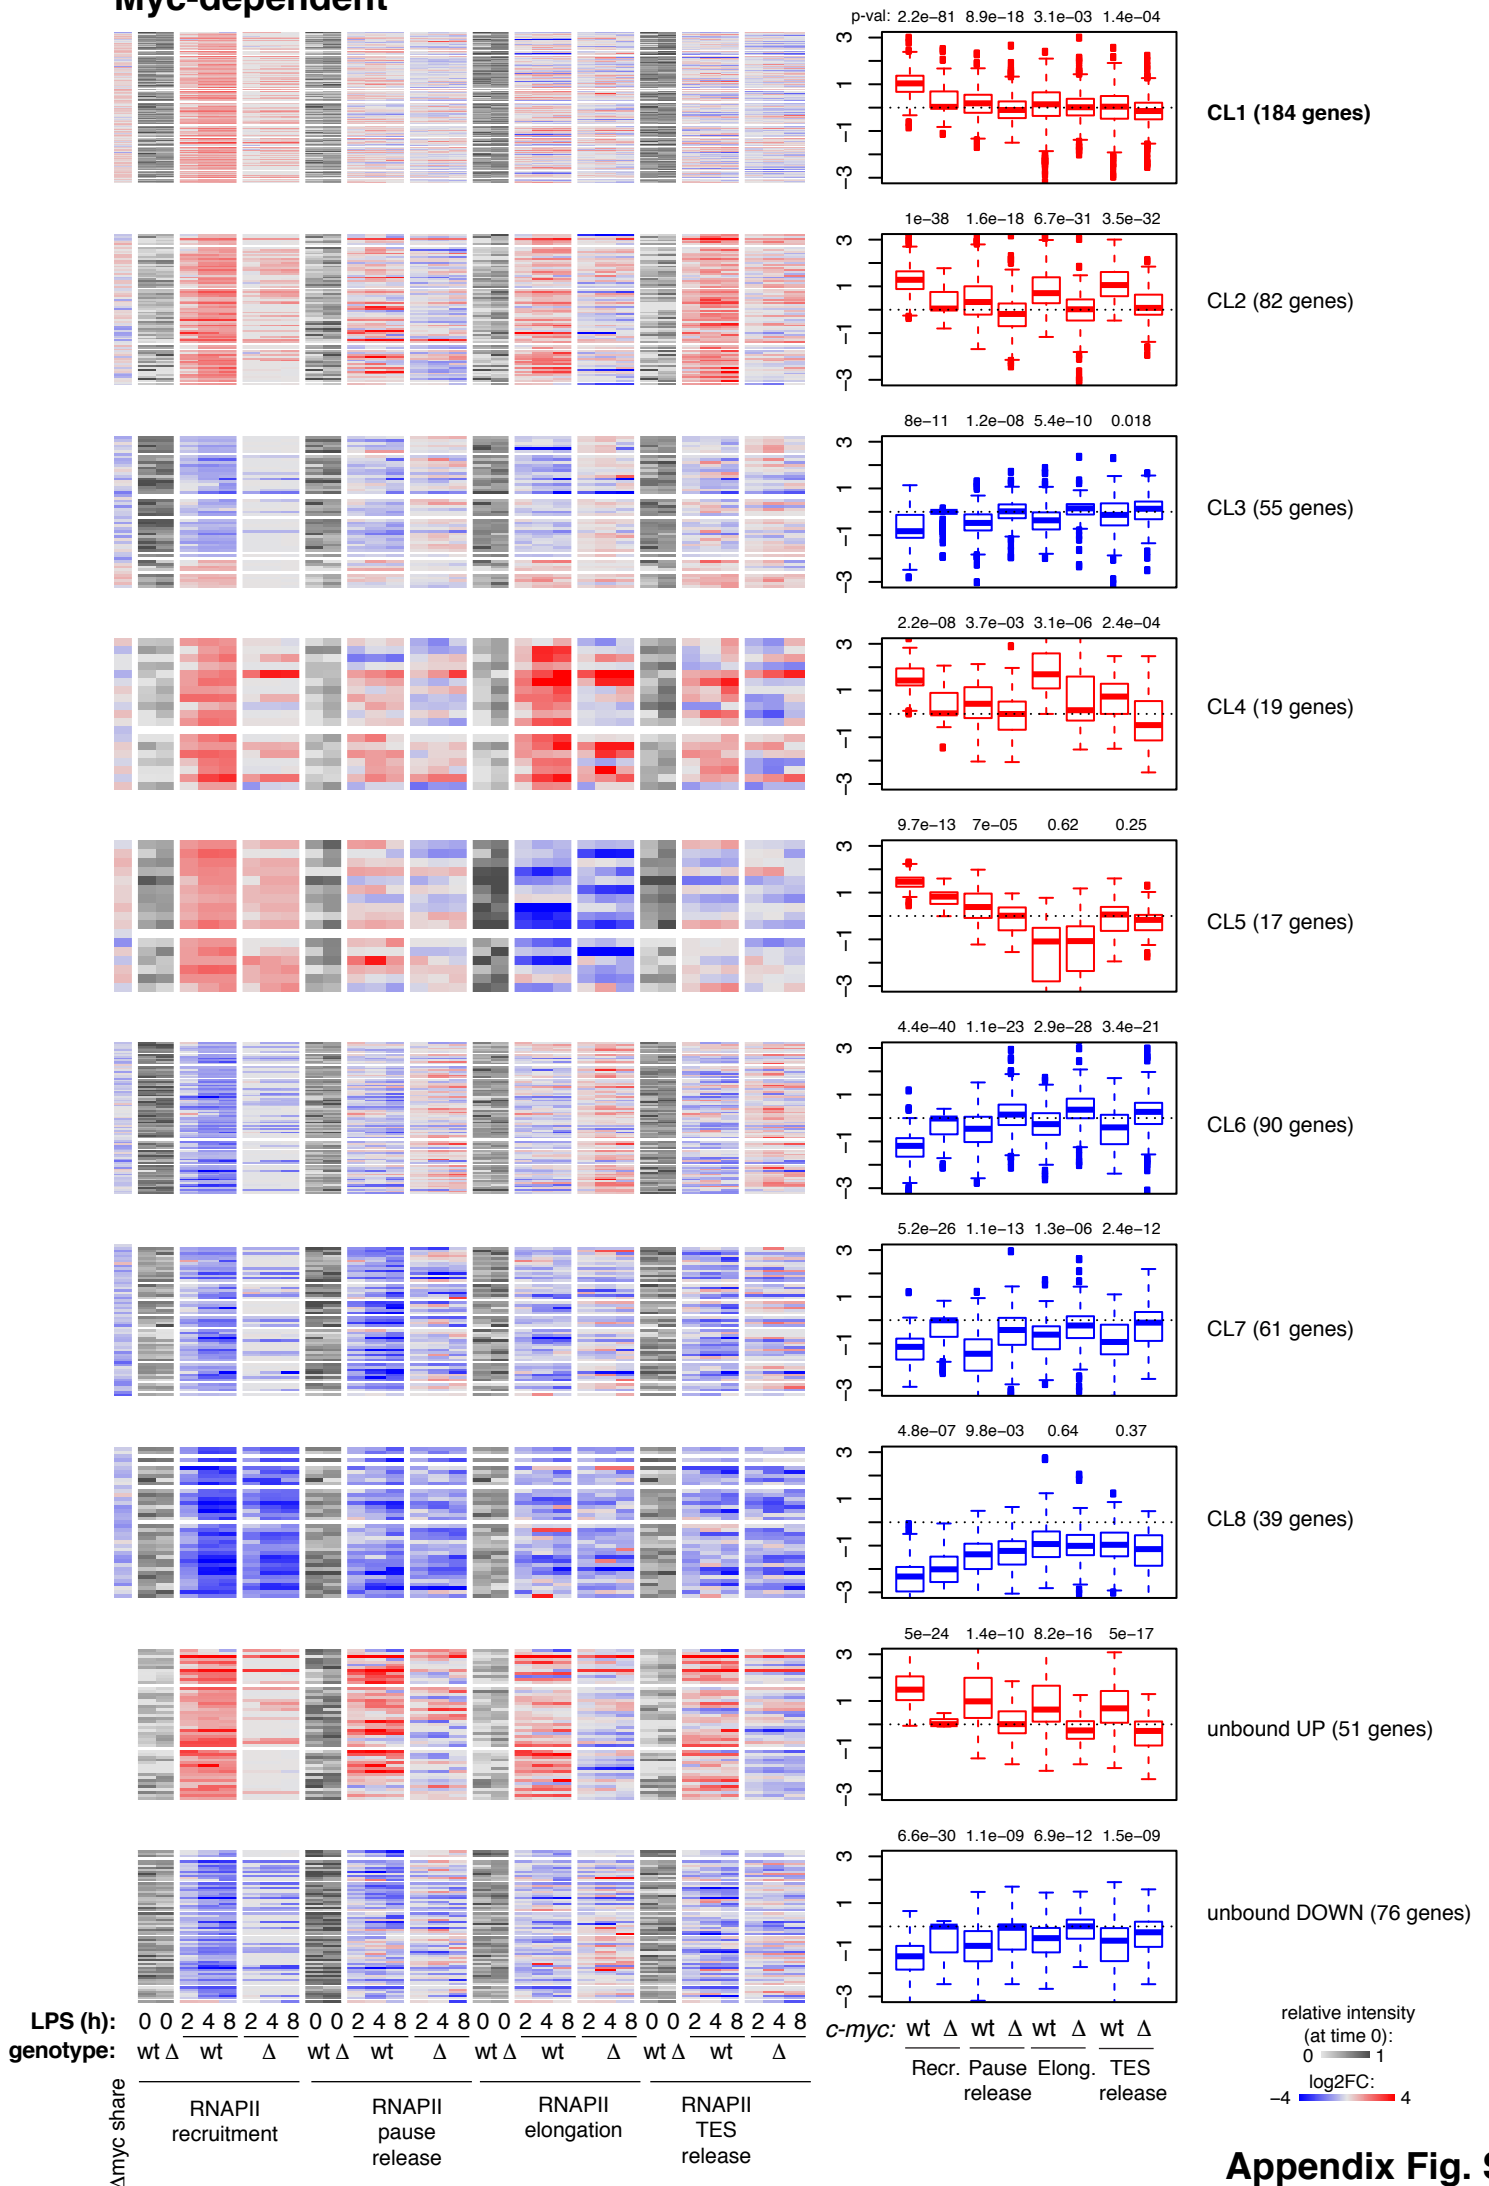

# Myc-independent

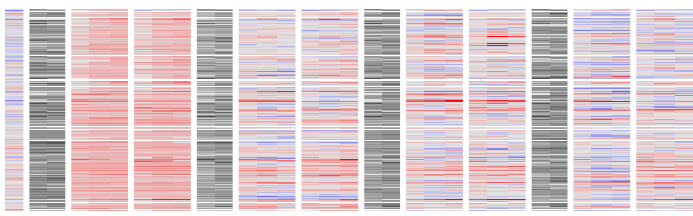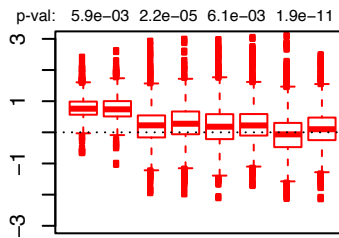

CL9 (260 genes)

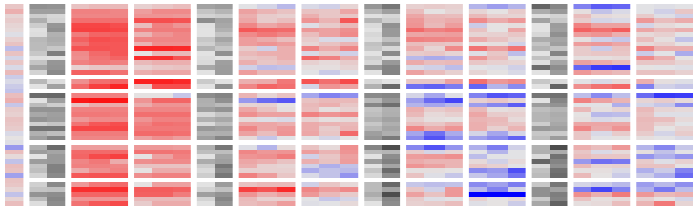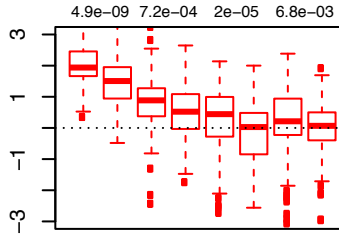

CL10 (43 genes)

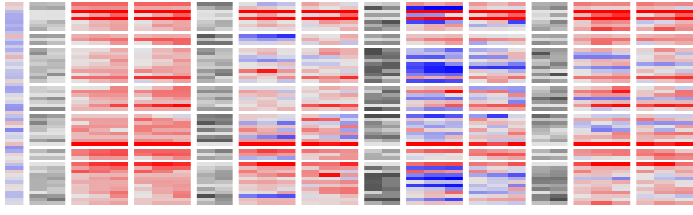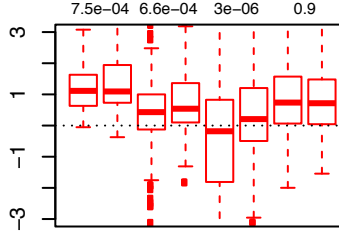

CL11 (58 genes)

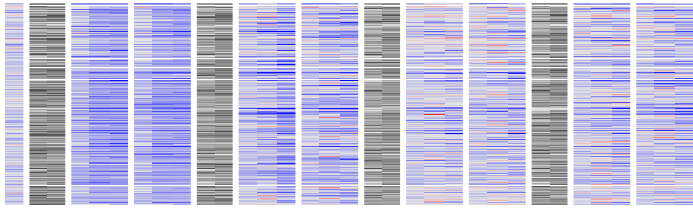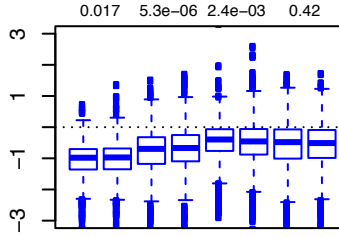

CL12 (398 genes)

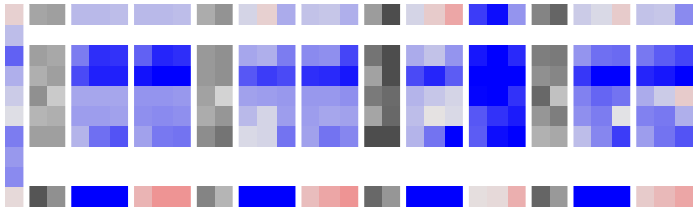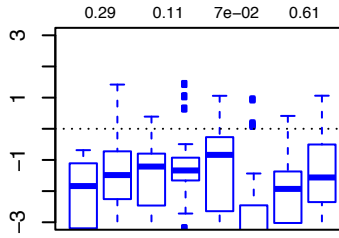

CL13 (10 genes)

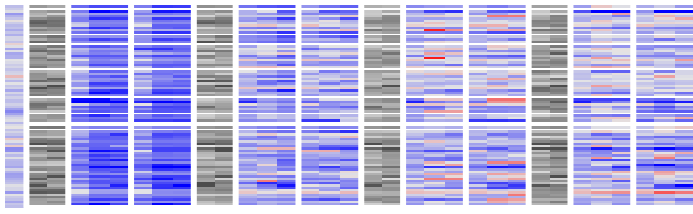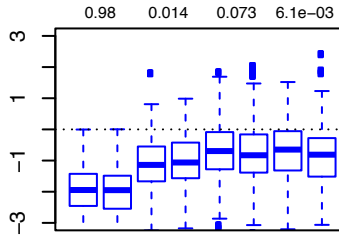

CL14 (87 genes)

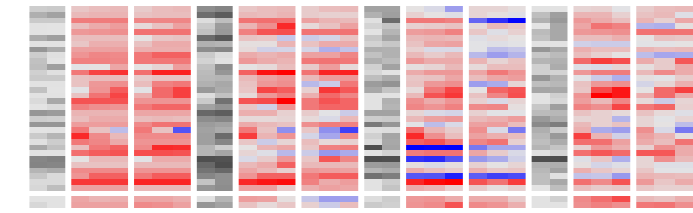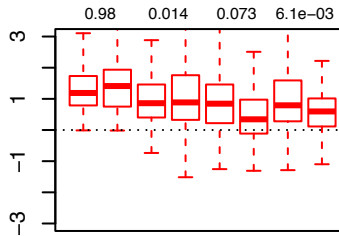

unbound UP (35 genes)

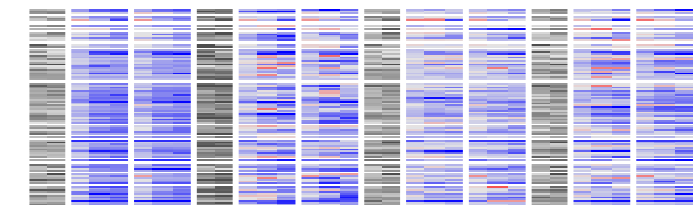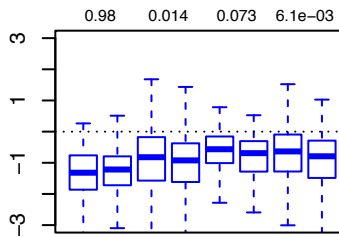

unbound DOWN (114 genes)

LPS (h): 0 0 2 4 8 2 4 8 0 0 2 4 8 2 4 8 0 0 2 4 8 2 4 8 0 0 2 4 8 2 4 8  
 genotype: wt Δ wt Δ

Δmyc share

RNAPII recruitment

RNAPII pause release

RNAPII elongation

RNAPII TES release

*c-myc*: wt Δ wt Δ wt Δ wt Δ  
 Recr. Pause Elong. TES  
 release release release release

relative intensity (at time 0):  
 0 1  
 log2FC:  
 -4 4

| <u>List of primers for gene expression</u> |             |                               |                         |
|--------------------------------------------|-------------|-------------------------------|-------------------------|
| Primers number                             | Gene Symbol | Forward                       | Reverse                 |
| AP10011-12                                 | Tbp         | TAATCCCAAGCGATTGCTG           | CAGTTGTCCGTGGCTCTCTT    |
| AP6540-41                                  | Myc         | TTTTTGTCTATTTGGGACAGTG        | CATCGTCGTGGCTGTCTG      |
| AP1985-86                                  | Ncl         | GTCTGAGGATACCACTGAAG          | GCCCAGTCCAAGGTAAC       |
| AP8859-60                                  | Pus7        | GCAGAAGAATTGAGGAGTACGG        | GGATGGAGTAGTTGTCAACGTCA |
| <u>List of primers for CHIP</u>            |             |                               |                         |
| Primers number                             | Gene Symbol | Forward                       | Reverse                 |
| AP4231-32                                  | AchR        | AGTGCCCCCTGCTGTCAGT           | CCCTTTCCTGGTGCCAAGA     |
| AP2829-30                                  | Ncl         | GGCGTGGTGACTCCACGT            | CGAAATCACCTCTAAAGCAGA   |
| <u>List of primers for gDNA</u>            |             |                               |                         |
| Primers number                             | Gene Symbol | Forward                       | Reverse                 |
| AP2829-30                                  | Ncl         | GGCGTGGTGACTCCACGT            | CGAAATCACCTCTAAAGCAGA   |
| AP1167-68                                  | myc fl/fl   | TCTAGACTTGCTTCCCTTGCTGT       | TTCCTGTTGGTGAAGTTCACGT  |
| AP1169-70                                  | myc Δ       | AAATAGTGATCGTAGTAAAATTTAGCCTG | ACCGTTCTCCTTAGCTCTCACG  |
| <u>List of primers for genotyping</u>      |             |                               |                         |
| Primers number                             | Gene Symbol | Forward                       | Reverse                 |
| AP6509-10                                  | myc         | CACCGCTACATCCTGTCCATTC        | TACAGTCCCAAGCCCCAGCCAAG |

**Appendix Table S1**
